# Supplementary material for: Effect of the magnetic field produced by a Halbach array magnetizer on water UV absorption, removal of scale and change in calcium carbonate polymorphs
Source: Royal Society of Chemistry journal article supplement (doi:10.1039/d2ay00569g), 2022-01-01
Supplement: d2ay00569g1.pdf [file d2ay00569g1.pdf]

*Supporting information for:*

**Effect of a magnetic field produced by Halbach array magnetizer on water UV absorption,  
removal of scale and change in calcium carbonate polymorph**

Chuchai Sronsri\*, Wanpasuk Sittipol, Kongpop U-yen

Future Innovation & Research in Science and Technology, Faculty of Engineering, Chulalongkorn  
University, Bangkok 10330, Thailand

Corresponding author: chuchai\_sronsri@hotmail.com

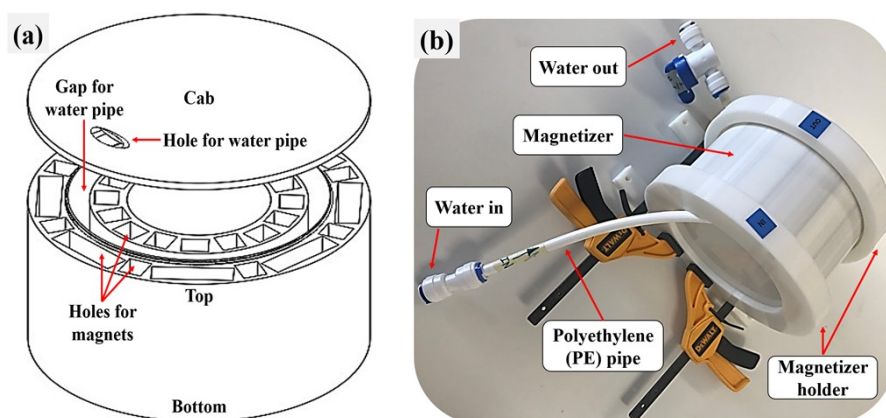

**Figure S1** Designed magnetizer used to magnetize samples (a) and magnetizer components (b)

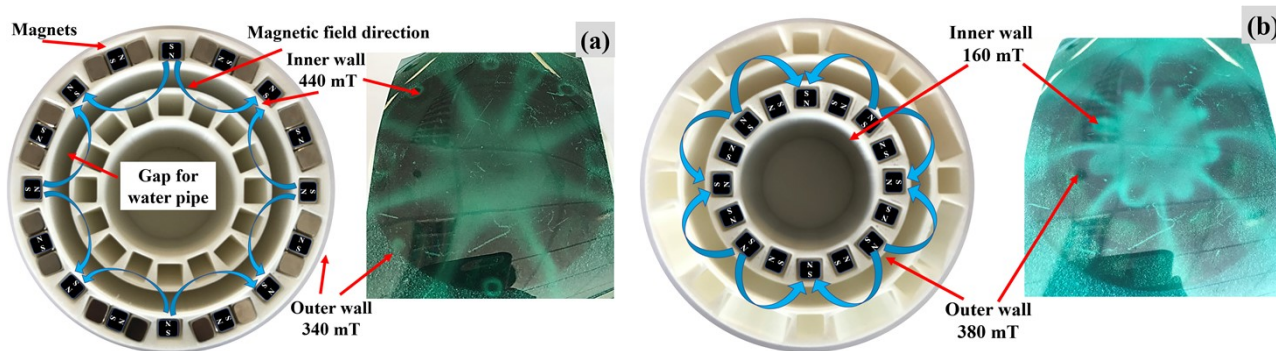

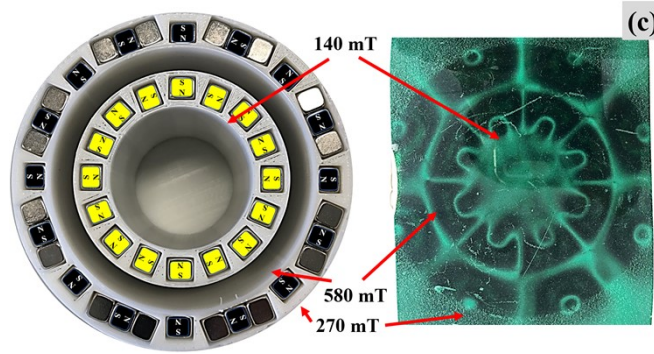

18

19 **Figure S2** Three different magnetic configurations: outside Halbach array (a), inside Halbach array  
20 (b), and dual Halbach array (c)

21

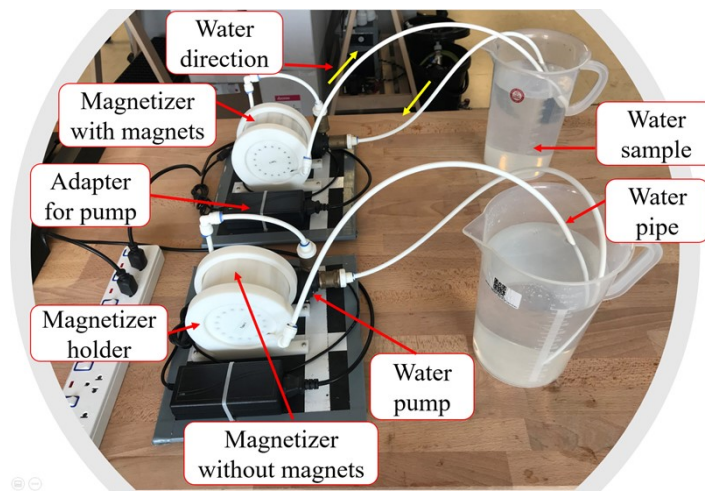

22

23 **Figure S3** Experimental setup applied to investigate the different results between magnetized  
24 (device with magnets) and unmagnetized (device without magnets) samples

25
